1 Hypothesis-free detection of gene-interaction effects on  
2 biomarker concentration in UK Biobank using variance  
3 prioritisation

4  
5 Matthew S. Lyon (0000-0002-2500-1013),<sup>1,2\*</sup> Louise A. C. Millard,<sup>2</sup> George Davey Smith,<sup>1,2</sup>

6 Tom R. Gaunt,<sup>1,2†</sup> Kate Tilling<sup>1,2†</sup>

7

8 1. National Institute for Health Research Bristol Biomedical Research Centre, University of  
9 Bristol, Oakfield House, Bristol, BS8 2BN, UK

10 2. Medical Research Council (MRC) Integrative Epidemiology Unit (IEU), Bristol Medical  
11 School (Population Health Sciences), University of Bristol, Oakfield House, Bristol, BS8  
12 2BN, UK

13

14 † These authors contributed equally to this work

15 \* To whom correspondence should be addressed. Tel: +44 (0) 117 331 4094; Email:

16 [matt.lyon@bristol.ac.uk](mailto:matt.lyon@bristol.ac.uk); Twitter: @matt\_s\_lyon

## 17 Abstract

18

19 Blood biomarkers include disease intervention targets that may interact with genetic and  
20 environmental factors resulting in subgroups of individuals who respond differently to  
21 treatment. Such interactions may be observed in genetic effects on trait variance. Variance  
22 prioritisation is an approach to identify genetic loci with interaction effects by estimating  
23 their association with trait variance, even where the modifier is unknown or unmeasured.  
24 Here, we develop and evaluate a regression-based Brown-Forsythe test and variance effect  
25 estimate to detect such interactions. We provide scalable open-source software (varGWAS)  
26 for genome-wide association analysis of SNP-variance effects  
27 (<https://github.com/MRCIEU/varGWAS>) and apply our software to 30 blood biomarkers in  
28 UK Biobank. We find 468 variance quantitative trait loci across 24 biomarkers and follow up  
29 findings to detect 82 gene-environment and six gene-gene interactions independent of  
30 strong scale or phantom effects. Our results replicate existing findings and identify novel  
31 epistatic effects of *TREH* rs12225548 x *FUT2* rs281379 and *TREH* rs12225548 x *ABO*  
32 rs635634 on alkaline phosphatase and *ZNF827* rs4835265 x *NEDD4L* rs4503880 on gamma  
33 glutamyltransferase. These data could be used to discover possible subgroup effects for a  
34 given biomarker during preclinical drug development.

35

## 36 Introduction

37

38 Blood biomarkers provide valuable information for diagnosis and prognosis of disease<sup>1</sup>,  
39 insight into biological mechanisms<sup>2</sup>, and a source of causal modifiable risk factors which may  
40 be intervened upon to create therapies<sup>1</sup>. For example, lipids, glucose, and urate have

41 become successful therapeutic targets for cardiovascular disease<sup>3</sup>, type 2 diabetes<sup>4</sup>, and  
42 gout<sup>5</sup>, respectively, among others. However, as biomarkers are complex traits they are  
43 affected by genetic and environmental factors which may interact producing gene-gene  
44 (GxG, epistasis) or gene-environment (GxE) effects<sup>6</sup>. Intervening on biomarkers which have  
45 an interaction effect on disease outcome will produce subgroup effects with individual  
46 variation in response to treatment dependent on the modifier<sup>7</sup>. Identifying these  
47 interactions may contribute to stratified medicine which aims to provide optimum  
48 treatments and preventative advice for disease based on individual characteristics<sup>6</sup>.

49

50 Detecting interaction effects can be challenging. Statistical power to detect an interaction is  
51 lower than for main effects; for randomised control trials the sample size needed to detect  
52 an interaction with equal sized subgroups is around four times the size needed to detect the  
53 main effect of the same magnitude<sup>7,8</sup>. Low power is exacerbated by multiple testing  
54 correction that is essential to account for evaluating the large numbers of candidate  
55 modifiers. To reduce multiple testing, pairwise interaction analyses of SNPs with moderate  
56 main effects can be performed. However, this approach could miss subgroups with an effect  
57 in only one group or opposing effect directionality (known as qualitative interaction effects<sup>7</sup>)  
58 hence weaker overall effects, yet these offer the most potential for stratified medicine. An  
59 alternative approach to select SNPs for GxG/GxE testing is variance prioritisation<sup>9,10</sup> which  
60 identifies differences in outcome variance across genotype levels (variance quantitative trait  
61 loci, vQTL). Although not conclusive evidence, this observation is consistent with a SNP-  
62 interaction effect<sup>11</sup> and detection of vQTLs does not require the modifier to be measured<sup>11</sup>.

63

64 Variance QTLs can arise as a consequence of heterogeneous mean effects that could occur  
65 from changing environment, background genetics and temporal regulation<sup>11</sup>. Among the  
66 first reported vQTL effects in humans was rs7202116 (*FTO* locus), associated with a large  
67 change in variance (as well as mean) of body mass index (BMI)<sup>12</sup>. More recently, systematic  
68 testing of vQTL effects on 13 quantitative traits in UK Biobank and subsequent GxE testing  
69 identified 16 GxE effects modified by age, sex, physical activity, sedentary behaviour, and  
70 smoking<sup>13</sup>. Variance QTLs have also been identified for gene expression<sup>14</sup>, DNA  
71 methylation<sup>15</sup>, Vitamin D<sup>16</sup> and facial morphology<sup>17</sup>. To date, gene-interaction studies have  
72 mostly focused on testing a small number of candidate interactions, but hypothesis-free  
73 testing of vQTL effects on blood biomarkers could lead to the identification of unanticipated  
74 intervention targets with subgroup effects.

75

76 Existing studies of vQTLs have employed a range of methods<sup>13,18-20</sup>. Wang *et al* compared  
77 the power and type I error of four widely used variance tests and found the median variant  
78 of Levene's test<sup>21</sup> also known as the Brown-Forsythe test<sup>13,22</sup> to be most robust. However,  
79 this test does not allow for inclusion of covariates or continuous genotype data (i.e.,  
80 imputed allelic dose) and does not provide an effect estimate, all of which are limitations  
81 when applied in a GWAS. However, the Brown-Forsythe test can be reformulated using  
82 least-absolute deviation<sup>15,23</sup> (LAD) regression using the same structure as the Glejser test<sup>24</sup>.  
83 Regression-based variance tests offer greater flexibility to overcome these limitations.  
84 Recent developments in LAD regression have vastly reduced the computational burden for  
85 large high-dimensional datasets<sup>25</sup>.

86

87 In this study we compare the utility of the original Brown-Forsythe test and our LAD  
88 regression-based reformulation of the Brown-Forsythe test (LAD-BF) to detect SNP-  
89 interaction effects under simulation and develop scalable open-source software  
90 (<https://github.com/MRCIEU/varGWAS>) for performing variance GWAS using the latter. We  
91 apply our regression-based model to estimate SNP effects on the variance of 30 blood  
92 biomarkers in ~337K UK Biobank participants and follow up vQTLs with formal interaction  
93 tests to detect GxG and GxE interactions.

94

## 95 [Material and methods](#)

96

### 97 [Original Brown-Forsythe test](#)

98

99 The Brown-Forsythe<sup>22</sup> test (median variant of Levene's test<sup>21</sup>) refers to the original  
100 published non-parametric test and will be used throughout. We applied the Brown-Forsythe  
101 test to detect differences in trait variability across the three genotypic groups.

102

103 The test statistic  $W$  is F-distributed  $F(2, N - 3)$  given by:

104

$$W = \frac{(N - 3)}{2} * \frac{\sum_{i=0}^2 N_i (\bar{X}_i - \bar{X})^2}{\sum_{i=0}^2 \sum_{j=1}^{N_i} (X_{ij} - \bar{X}_i)^2}$$

105

106 Where  $N$  is the total number of observations.  $N_i$  is the number of observations with the  $i$ th  
107 genotype group  $\{0, 1, 2\}$ .  $X_{ij}$  is the absolute residual of the outcome for the  $j$ th observation

108 in the  $i$ th genotype group from the median.  $\bar{X}_i$  is the mean of  $X_{ij}$  for the  $i$ th genotype group  
109 and  $\bar{X}$  is the mean of  $X_{ij}$  across genotype groups.

110

111 All analyses of the original Brown-Forsythe test used the omic-data-based complex trait  
112 analysis (OSCA) software package<sup>13,26</sup> which additionally produces a variance effect estimate  
113 derived from the test P-value assuming linearity between the SNP and outcome variance<sup>27</sup>.

114

115 **LAD-BF test**

116

117 Our reformulated regression-based Brown-Forsythe test uses LAD regression of outcome  $Y$   
118 on independent variable  $X$  to estimate the residuals adjusting for any covariates:

119

$$Y = \hat{\beta}_0 + \hat{\beta}_1 X + \hat{U}$$

120

121 Where  $X$  is the genotype measured by continuous (expected value from genotype  
122 imputation) or ordinal (directly genotyped) variable and  $\hat{U}$  is the residual of this first-stage  
123 model.

124

125 A second-stage ordinary least squares (OLS) model regressed the absolute residuals  $|\hat{U}|$  of  
126 the first-stage model on the genotype values coded as dummy variables (genotype expected  
127 values were rounded to the nearest whole number resulting in some loss of precision)  
128 including any covariates given in the first-stage model:

129

$$|U| = \hat{\gamma}_0 + \hat{\gamma}_1 X_1 + \hat{\gamma}_2 X_2 + \hat{E}$$

130

131 The test P-value was estimated from an F-test comparing the second-stage residual sum of  
132 squares to an intercept-only model to test the null hypothesis of variability homogeneity  
133 across genotypes.

134

135 SNP effects on trait variance were calculated from second-stage regression coefficients  
136 which are estimates of mean-absolute deviation. This transformation assumes trait  
137 normality.

138 The  $var(Y|G == 1)$  was estimated using:

$$2 * \hat{\gamma}_0 + \hat{\gamma}_1 + \hat{\gamma}_1^2 / \left(\frac{2}{p_i}\right)$$

139 The  $var(Y|G == 2)$  was estimated using:

$$2 * \hat{\gamma}_0 + \hat{\gamma}_2 + \hat{\gamma}_2^2 / \left(\frac{2}{p_i}\right)$$

140 The standard error of the variance effect was estimated using the delta method<sup>28</sup> and  
141 heteroscedastic-consistent standard errors for the second-stage model coefficients<sup>29</sup>.

142

143 LAD regression was implemented using the majorise-minimisation<sup>25,30</sup> (MM) model with  
144 default values for iterations (200) and tolerance (0.001) and first-stage OLS regression  
145 coefficients provided as initial values.

146

## 147 Software

148

149 The LAD-BF test was implemented in varGWAS available in C++ v1.2.3 and R v1.0.0 (refer to  
150 the code and data availability section). The MM model used functionality from the cqrReg R-

151 package<sup>25</sup> (<https://cran.r-project.org/web/packages/cqrReg/index.html>). OLS and general  
152 matrix functionality were provided with Eigen v3.4.0<sup>31</sup>. BGEN file processing used the BGEN  
153 library<sup>32</sup> v1.1.6.

154

155 The original Brown-Forsythe test used the OSCA software package v0.46<sup>13,26</sup>. Simulations  
156 and follow up UK Biobank analyses were performed using R v3.6.0.

157

## 158 Simulations

159

160 The bias and statistical power of the two Brown-Forsythe tests were evaluated through a  
161 series of simulation studies reported using the ADEMP structure<sup>33</sup> (**Table 1 & Supplemental**  
162 **Material and Methods**).

163

## 164 Participants

165

166 UK Biobank is a large prospective cohort study of approximately 500,000 UK participants  
167 aged 37-73 at recruitment<sup>34</sup>. Recruitment took place between 2006-2010 from across the  
168 UK. Measures were collected on lifestyle, socio-demographics, physical parameters, health-  
169 related factors, and biological samples for genetic testing and biomarker measurements.  
170 Ethical approval for the UK Biobank study was granted by the National Research Ethics  
171 Service (NRES) Committee North West (ref 11/NW/0382). All analyses were performed  
172 under approved UK Biobank project 15825 (dataset ID 33352).

173



## 174 Genetic data

175

176 Genetic array data were available on 488,377 participants measured using a combination of  
177 UK Biobank Axiom™ array (n=438,398) and UK BiLEVE array (n=49,979). Genotype  
178 imputation was performed using a reference set combined with UK10K haplotypes and HRC  
179 reference panels with the IMPUTE2<sup>35</sup> software as described<sup>36</sup>. The following SNPs were  
180 removed from analysis leaving a total of 6,812,700: multi-allelic loci, minor allele frequency  
181 < 5%, Hardy-Weinberg violations ( $P < 1 \times 10^{-5}$ ), genotype missing rate >5%, low imputation  
182 score (INFO < 0.3) and *HLA* locus (hg19/GRCh37 chr6:23477797-38448354).

183

## 184 Quality control

185

186 We applied standard exclusion criteria (**Figure S1**) to remove genotype-phenotype sex  
187 mismatches, aneuploidies, and outliers for missingness or heterozygosity as previously  
188 described<sup>36</sup> leaving n=486,565 participants. To ensure data independence, closely related  
189 subjects were removed as described elsewhere<sup>36</sup> leaving n=407,176 participants. Finally,  
190 ‘non-white British’ participants defined using published methodology<sup>36</sup> were removed to  
191 avoid confounding by population stratification providing a total sample size of n=377,076.

192

## 193 Phenotypes

194

195 UK Biobank measures of 30 serum biochemistry markers were available for approximately  
196 500k participants. Each measure was chosen based on being an established risk factor for  
197 disease, a clinical diagnostic measure or because it characterises a phenotype that is not

198 well assessed by other approaches as described in the UK Biobank documentation<sup>37</sup>.  
199 Quantification and quality control was performed as previously described<sup>37</sup>. Total physical  
200 activity was calculated by summing self-reported duration of walking, moderate and  
201 vigorous activity collected using the International Physical Activity Questionnaire as  
202 described<sup>38</sup>. For each analysis participants with missing data were removed. All continuous  
203 outcomes were SD normalised.

204

## 205 Genome-wide association studies (GWAS)

206

207 GWAS of biomarker variability were performed using our LAD regression-based Brown-  
208 Forsythe test adjusted for age, sex, and the top ten genetic principal components in first and  
209 second regression models. We removed outlier biomarker values with a Z-score > 5SD from  
210 the mean to control type I error inflation as previously described<sup>13</sup>. Quality control was  
211 undertaken visually using Q-Q plots to check for a departure of P-value distribution from  
212 that expected under the null. Independent vQTLs were identified by clumping GWAS loci  
213 that passed the experiment-wise genome-wide evidence threshold  $P < 1.67 \times 10^{-9}$   
214 (Bonferroni correction of standard GWAS threshold:  $p = 5 \times 10^{-8} / 30$ ) using the OpenGWAS  
215 API<sup>39</sup> with default  $R^2$  threshold of 0.001 and 1000 genomes phase 3 European ancestry<sup>40</sup>.

216

## 217 Gene interaction test

218

219 Independent vQTLs (see above) were tested for interaction effects on additive and  
220 multiplicative scales using heteroscedasticity-consistent standard errors<sup>29</sup> adjusted for age,  
221 sex, and top ten genetic principal components. To ensure effects were robust to phantom

222 effects<sup>41</sup>, we performed sensitivity analyses adjusting for fine-mapped main effects  
223 identified using SuSiE<sup>42</sup> (**Supplemental Material and Methods**). Interactions surpassing  
224 genome-wide association significance ( $P < 5 \times 10^{-8}$ ) on additive and multiplicative scales that  
225 did not strongly attenuate with adjustment for fine-mapped main effects were prioritised  
226 for subgroup analyses. GxG effects were identified through interaction testing with  
227 independent ( $R^2 < 0.001$ ) vQTLs excluding pairwise combinations of vQTLs within a 10Mb  
228 window as previously described<sup>13</sup>. GxE testing was performed using candidate modifiers:  
229 age, sex, body mass index, alcohol intake, smoking status, physical activity, daily sugar  
230 intake, and daily fat intake.

231

## 232 Subgroup analyses

233

234 Subgroup effects of top interaction effects were presented by estimating the SNP effect on  
235 the outcome stratified by modifier using heteroscedasticity-consistent standard errors<sup>29</sup>  
236 adjusted for age, sex and top ten genetic principal components. Modifiers were rounded  
237 genetic dosage values or prepared by dichotomisation as follows: below or above the  
238 median value for continuous variables (group [G] 1, below median; G2, median or greater),  
239 ever (G1) vs never (G2) smoker, alcohol intake once a week or more (G1) vs less than once a  
240 week on average (G2), males (G1) vs females (G2). Subgroup effects are presented along  
241 with the SNP-variance estimates adjusted for age, sex and top ten genetic principal  
242 components with and without adjustment for the interaction term (variance effects were  
243 not adjusted for sex when sex was the modifier).

244

## 245 Gene annotation

246

247 Variance QTLs were annotated with the nearest gene using the closest function of  
248 bedtools<sup>43</sup> (v2.3.0) and Ensembl v104 (GRCh37) protein-coding features which were filtered  
249 to retain HUGO<sup>44</sup> valid identifiers. The following annotations were recoded based on  
250 expression QTL evidence<sup>45,46</sup>: rs4530622 *SLC2A9*, rs11244061 *ABO*, rs71633359 *HSD17B13*,  
251 rs28413939 *TREH*, rs281379 *FUT2*, rs635634 *ABO*, rs964184 *APOA5*.

252

## 253 Results

254

### 255 Simulated power and type I error to detect interaction effects by change in variance

256

257 The power to detect a difference in trait variability due to an interaction effect was low and  
258 equivalent for both methods (**Figure S2**). Suppose a SNP has a main effect on a normally  
259 distributed outcome detectable with 80% power, then 10x the sample size needed to detect  
260 the main effect was required to detect the interaction with only 50% power assuming the  
261 interaction was half the size of the main effect. Positive skew and kurtosis reduced power.  
262 Both methods had equally well controlled type I error (**Figure S3**).

263

### 264 Simulated variance effect estimate and confidence interval coverage

265

266 Under a simulated linear effect of genotype on outcome variance both methods gave the  
267 correct effect estimate and 95% confidence interval coverage (**Figure 1**). However, when the  
268 difference in variance was a consequence of an interaction effect, the relationship between

269 the genotype and outcome variance was non-linear and dependent on the modifier. Under  
270 these conditions, the variance effect estimate produced using OSCA<sup>26,27</sup> from the Brown-  
271 Forsythe test P-value gave the incorrect effect size while LAD-BF produced the correct  
272 estimate albeit with slightly elevated coverage.

273

#### 274 Adjusting the LAD-BF test for an interaction effect through simulation

275

276 We simulated an interaction effect and compared the LAD-BF test P-value distributions with  
277 and without adjusting for the simulated interaction (**Figure S4**). Including the interaction  
278 term in the first-stage regression model completely attenuated the variance test statistic.  
279 After identifying an interaction at a variance locus this approach could be applied to  
280 determine if additional strong interaction effects exist and could be used in a stepwise  
281 regression fashion until all interaction effects are identified.

282

#### 283 Runtime performance

284

285 Increasing the number of CPU threads reduced the total runtime of both methods to  
286 process 1000 SNPs (**Figure S5**). For the C++ implementation of LAD-BF in varGWAS, the  
287 lowest average runtime was 13.6 second (95% CI 13.5, 13.7) using four threads of an Intel(R)  
288 Xeon(R) CPU E5-2680 v4 @ 2.40GHz. Under the same conditions, the original Brown-  
289 Forsythe test implemented in OSCA was 1.78x faster (7.61 seconds [95% CI 7.60, 7.63]).

290

#### 291 GWAS of variance effects in UK Biobank

292

293 We identified 468 independent ( $R^2 < 0.001$ ) vQTLs influencing 24 biomarkers (**Figure S6**,  
294 **Figure S7 & Table S1**) using an experiment-wise P-value threshold of  $1.67 \times 10^{-9}$  ( $5 \times 10^{-8} /$   
295 30) and no variance effects for albumin, calcium, oestradiol, phosphate, rheumatoid factor,  
296 or total protein. Oestradiol and rheumatoid factor were measured on a subset of  $n=76,674$   
297 and  $n=41,315$  participants respectively and therefore were less well powered to detect  
298 effects. Of these vQTLs, 270 (57.7%) had suggestive evidence for a variance effect on the log  
299 scale ( $P < 5 \times 10^{-5}$ ) and 453 (96.8%) had a mean effect ( $P < 5 \times 10^{-8}$ ). The low concordance  
300 between natural and log scales and high concordance between mean and variance effects  
301 suggests the presence of mean-variance relationships which is a likely consequence of  
302 extreme non-normality for some of the trait distributions (**Figure S8**).

303

#### 304 Gene-environment interaction effects (GxE)

305

306 We detected 139 additive and 104 multiplicative GxE effects ( $P < 5 \times 10^{-8}$ ; **Figure S9 & Figure**  
307 **S10**). Adjusting the additive effects for fine-mapped main effects (**Figure S11**) led to a small  
308 increase in *UGT1A8* rs2741047 x sex on direct bilirubin to 0.037 SD (95% CI 0.032, 0.042)  
309 from 0.028 SD (95% CI 0.023, 0.033) and minor attenuation of *MAP3K4* rs1247295 x sex on  
310 lipoprotein a to -0.011 SD (95% CI -0.015, -0.007) from -0.016 SD (95% CI -0.021, -0.010).  
311 These findings could reflect the presence of large main effects in imperfect linkage  
312 disequilibrium with the index SNP which is known to inflate/deflate test statistics<sup>41</sup>.

313

314 We prioritised 82 GxE effects with evidence on both scales ( $P < 5 \times 10^{-8}$ ) to avoid spurious  
315 interactions dependent on scale (**Table S2**). Of these BMI ( $n=35$ ), sex ( $n=27$ ) and age ( $n=17$ )  
316 modified most effects and smoking status ( $n=2$ ) and alcohol intake ( $n=1$ ) fewer. We also

317 tested for interaction by physical activity, and sugar and fat intake but identified little  
318 evidence of interactions. The largest effects (**Figure 2**) were: *PNPLA3* rs738409 x BMI on  
319 alanine aminotransferase (ALT; 0.08 SD [95% CI 0.08, 0.09]), *SLC2A9* rs938555 x sex on urate  
320 (-0.08 SD [95% CI -0.09, -0.08]), *APOE* rs1065853 x sex on low-density lipoprotein (LDL; 0.06  
321 SD [95% CI 0.05, 0.07]), *SHBG* rs1799941 x sex on testosterone (0.06 SD [95% CI 0.06, 0.06])  
322 and *TM6SF2* rs58542926 x BMI on ALT (0.05 SD [95% CI 0.04, 0.06]). Adjusting the variance  
323 effect for the interaction term (**Figure 2**) led to attenuation of *PNPLA3* rs738409 and  
324 *TM6SF2* rs58542926 on ALT and *SHBG* rs1799941 on testosterone but strong variance  
325 effects on ALT remained at *PNPLA3* rs738409 (LAD-BF  $P_{\text{adjust}} = 1.0 \times 10^{-73}$ ) and *TM6SF2*  
326 rs58542926 (LAD-BF  $P_{\text{adjust}} = 1.84 \times 10^{-8}$ ). There was no strong variance attenuation of  
327 *APOE* rs1065853 on LDL or *SLC2A9* rs938555 on urate following adjustment for the  
328 interaction (**Figure 2**).

329

### 330 Gene-gene interaction effects (GxG)

331

332 We detected eight GxG effects on the additive scale ( $P < 5 \times 10^{-8}$ ; **Figure S12**), six of which  
333 were also associated on the multiplicative scale ( $P < 5 \times 10^{-8}$ ; **Figure S13**). There was no  
334 strong attenuation following adjustment for fine-mapped main effects (**Figure S14**)  
335 suggesting phantom epistasis<sup>41,47</sup> was not a major source of bias. *ZNF827* rs4835265 x  
336 *NEDD4L* rs4503880 was inversely associated with -0.04 SD (95% CI -0.05, -0.03) gamma  
337 glutamyltransferase (GGT), *ABO* rs635634 x *FUT2* rs281379, *ABO* rs635634 x *TREH*  
338 rs12225548, and *TREH* rs12225548 x *FUT2* rs281379 were associated with 0.08 SD (95% CI  
339 0.07, 0.09), 0.04 SD (95% CI 0.03, 0.05) and 0.02 SD (95% CI 0.02, 0.03) increase in alkaline  
340 phosphatase (ALP) respectively, *HSD17B13* rs71633359 x *PNPLA3* rs738409 and *HSD17B13*

341 rs71633359 x *PNPLA3* rs3747207 were associated with -0.04 SD (95% CI -0.05, -0.03) and -  
342 0.04 SD (95% CI -0.05, -0.03) decrease in ALT and aspartate aminotransferase (AST)  
343 respectively (**Figure 3**). Adjusting the variance effects for the interaction term had no strong  
344 impact on the variance estimate (**Figure 3**).

345

## 346 Discussion

347

348 Here we demonstrate the value of variance GWAS in identifying 468 independent vQTLs  
349 with evidence of interaction on 24 serum biochemistry phenotypes in UK Biobank and  
350 subsequently identify 82 GxE and six GxG scale independent effects. To facilitate this large-  
351 scale analysis on ~337K UK Biobank participants we developed an efficient C++  
352 implementation of a LAD regression-based Brown-Forsythe test<sup>22</sup> (implemented in  
353 varGWAS) with functionality to reliably estimate variance effects and compared the test  
354 with the original non-parametric version (implemented in OSCA<sup>13,26</sup>) through a series of  
355 simulations.

356

357 Although the power to detect genetic interaction effects using variance prioritisation was  
358 low, when applied to large sample sizes such as UK Biobank strong evidence for association  
359 can be identified as demonstrated in this study and by Wang *et al*<sup>13</sup>. We found LAD-BF had  
360 several advantages over the original non-parametric test when applied to GWAS. First, LAD-  
361 BF directly supports adjustment for covariates (although this could be achieved using the  
362 original test if applied to pre-adjusted phenotypes<sup>13</sup>). Second, LAD-BF can test effects of  
363 continuous genotypes which enables application to the expected genotype value (“dose”)  
364 from imputed SNP array data. Third, our model provides a variance effect estimate which is



365 valid when there is a SNP interaction effect, unlike the implementation of the original  
366 Brown-Forsythe test in OSCA which provides an incorrect variance effect estimate derived  
367 from the test P-value<sup>27</sup>. We also demonstrate through simulation that adjusting the variance  
368 effect for the interaction term causes attenuation which is useful to determine if other  
369 interactions exist and could potentially be applied using stepwise regression until all  
370 interaction effects are discovered, subject to sufficient power. However, there are some  
371 disadvantages. The runtime was 75% longer than the original test implemented in OSCA,  
372 although this is still fast enough to allow large-scale analyses. Second, the effect estimate  
373 (but not test statistic) is based on normality assumptions which may be violated in practice.  
374

375 The largest GxE effects replicate existing findings: *PNPLA3* rs738409 x BMI on ALT levels<sup>48,49</sup>,  
376 *SLC2A9* rs938555 x sex on urate<sup>50</sup>, *APOE* rs1065853 x sex on LDL<sup>51</sup>, *SHBG* rs1799941 x sex on  
377 testosterone<sup>52</sup>, and *TM6SF2* rs58542926 x BMI on ALT<sup>48</sup>. Adjusting the variance effect for  
378 the interaction led to attenuation of *PNPLA3* rs738409 and *TM6SF2* rs58542926 on ALT and  
379 *SHBG* rs1799941 on testosterone, however strong evidence of variance effects remained for  
380 ALT at *PNPLA3* rs738409 and *TM6SF2* rs58542926 suggesting other interaction effects may  
381 exist at these loci. The variance effect of *SHBG* rs1799941 on testosterone was weak after  
382 adjusting for rs1799941 x sex suggesting no strong evidence of further interaction effects on  
383 testosterone at this locus, but the test may be underpowered to detect additional effects.  
384

385 We replicated previous GxG effects of *ABO* rs635634 x *FUT2* rs281379 on ALP<sup>53,54</sup> and  
386 *HSD17B13* rs71633359 x *PNPLA3* rs738409/rs3747207 on ALT and AST<sup>55,56</sup> and find no  
387 strong evidence of 'phantom epistasis'<sup>41,47</sup> as a potential explanation. Additionally, we  
388 identified novel effects of *TREH* rs12225548 x *FUT2* rs281379 and *ABO* rs635634 x *TREH*

389 rs12225548 on ALP and *ZNF827* rs4835265 x *NEDD4L* rs4503880 on GGT. ABO blood group  
390 antigens and secretion status are thought to influence ALP clearance<sup>57,58</sup>. *TREH* rs12225548  
391 has a strong main effect on ALP<sup>39,59,60</sup> and interactions of these loci may be explained by  
392 interplay of ALP production and clearance mechanisms. *ZNF827* and *NEDD4L* loci have  
393 previously been reported to influence GGT levels in independent populations but the  
394 mechanism is unclear<sup>61,62</sup>.

395

396 None of the GxG loci variance effects strongly attenuated after adjusting for the interaction  
397 term. This could be a consequence of low power since the interaction effect likely explains a  
398 very small amount of the trait variance but could also indicate the presence of other  
399 interaction effects involving the same SNP not included in the variance model. Indeed, we  
400 found strong GxE evidence at some of these loci: *ABO* rs635634 x sex on ALP, *HSD17B13*  
401 rs71633359 x BMI and *PNPLA3* rs738409/rs3747207 x BMI on ALT and AST.

402

403 Evidence of gene-interaction effects could suggest the protein product also has an  
404 interaction effect. In which case interventions developed to target the protein will show  
405 differential effects on the indication and could have low or no efficacy in some subgroups<sup>63</sup>.

406 Such evidence could be important to support developments in stratified medicine.

407 Therefore, vQTL evidence may have a role in preclinical drug development to deprioritise  
408 targets given the possibility of target-outcome heterogeneous effects. Further research is  
409 needed to appraise the utility of vQTLs in the drug development pipeline as has been done  
410 for protein QTLs<sup>64</sup>.

411

412 However, there are other explanations for vQTLs that are not in terms of biology. First, loci  
413 that are weakly correlated with a SNP having a strong main effect can introduce a phantom  
414 vQTL<sup>65,66</sup>. In this situation variance is introduced through variability in LD between the  
415 artefactual vQTL and QTL. Second, vQTLs could signify fluctuation of a trait measurement  
416 within an individual over time<sup>10</sup> and may originate from normal biological processes such as  
417 circadian rhythm. Third, we assume homogeneity of variance within each genotype group  
418 which could be violated by the mean-variance relationship and observed low concordance  
419 of vQTL effects on the log and natural scales are evidence for this. Additionally, our  
420 interactions could be explained by non-linear relationships between the exposure and  
421 outcome or scale artefacts<sup>67</sup>. We sought to reduce the latter by replicating effects on  
422 additive and multiplicative scales.

423

424 Through this work we performed hypothesis-free analyses of genetic interaction effects on  
425 30 blood biomarkers in UK Biobank using variance prioritisation and found evidence for 88  
426 effects. Many of our top findings replicate previously reported associations, but we also  
427 report first evidence of *TREH* rs12225548 x *FUT2* rs281379 and *TREH* rs12225548 x *ABO*  
428 rs635634 on ALP and *ZNF827* rs4835265 x *NEDD4L* rs4503880 on GGT. Additionally, we  
429 show variance attenuation of *PNPLA3* rs738409 and *TM6SF2* rs58542926 on ALT and *SHBG*  
430 rs1799941 on testosterone after adjusting for the interaction indicating these effects were  
431 contributing to the variance association, but the ALT effects were still strong suggesting  
432 additional interactions may exist at these loci. These data could be used to discover possible  
433 subgroup effects for a given biomarker during preclinical drug development. To facilitate our  
434 analysis, we developed C++ variance GWAS software that implements a LAD-regression  
435 based Brown-Forsythe test, provide a convenient R-package based on this software and

436 introduce methodology to estimate the variance effects which can be applied to other  
437 studies.

438

## 439 [Supplemental information description](#)

440

441 Supplemental Material and Methods

442 Figure S1. UK Biobank participant inclusion criteria

443 Figure S2. Power to detect SNP-interaction effects using variance testing under simulation

444 Figure S3. Type I error of Brown-Forsythe tests

445 Figure S4. Effect of adjustment for the interaction effect on variance test P-value

446 distribution

447 Figure S5. Runtime performance of varGWAS and OSCA

448 Figure S6. Manhattan plots of biomarker variance GWAS using regression-based Brown-

449 Forsythe test

450 Figure S7. Q-Q plots of biomarker variance GWAS using regression-based Brown-Forsythe

451 test

452 Figure S8. Biomarker distribution

453 Figure S9. Top gene-by-environment interaction effects ( $P < 5 \times 10^{-8}$ ) on biomarker

454 concentration using additive scale

455 Figure S10. Top gene-by-environment interaction effects ( $P < 5 \times 10^{-8}$ ) on biomarker

456 concentration using multiplicative scale

457 Figure S11. Top gene-by-environment interaction effects ( $P < 5 \times 10^{-8}$ ) on biomarker

458 concentration using additive scale adjusted for fine-mapped main effect

459 Figure S12. Top gene-by-gene interaction effects ( $P < 5 \times 10^{-8}$ ) on biomarker concentration  
460 using additive scale

461 Figure S13. Top gene-by-gene interaction effects ( $P < 5 \times 10^{-8}$ ) on biomarker concentration  
462 using multiplicative scale

463 Figure S14. Top gene-by-gene interaction effects ( $P < 5 \times 10^{-8}$ ) on biomarker concentration  
464 using additive scale adjusted for fine-mapped main effects

465 Table S1. GWAS summary statistics for top vQTLs identified through this study

466 Table S2. Top GxG/GxE effect summary statistics

467 Table S3. Fine-mapped loci covariates

468

## 469 [Declaration of Interests](#)

470

471 T.R.G receives funding from Biogen for unrelated research. K.T has been paid for  
472 consultancy for CHDI.

473

## 474 [Acknowledgements](#)

475

476 This study was funded by the NIHR Biomedical Research Centre at University Hospitals  
477 Bristol and Weston NHS Foundation Trust and the University of Bristol. The views expressed  
478 are those of the author(s) and not necessarily those of the NIHR or the Department of  
479 Health and Social Care. This work was also funded by the UK Medical Research Council as  
480 part of the MRC Integrative Epidemiology Unit (MC\_UU\_00011/1, MC\_UU\_00011/3 and  
481 MC\_UU\_00011/4). L.A.C.M is funded by a University of Bristol Vice-Chancellor's fellowship.

482

483 [Code and data availability](#)

484

485 Software to perform variance GWAS using the LAD Brown-Forsythe model is available from

486 <https://github.com/MRCIEU/varGWAS> and R-package for *ad hoc* analyses is available from

487 <https://github.com/MRCIEU/varGWASR>. Code for performing simulation studies is available

488 from <https://github.com/MRCIEU/varGWAS/sim>. Code for running the UK Biobank analysis

489 is available from <https://github.com/MRCIEU/varGWAS-ukbb-biomarkers>. Full variance

490 GWAS summary statistics are available from the OpenGWAS project<sup>39,68</sup>. All code

491 repositories are available under the GPL v3 license.

## 492   References

493

494   1. Holmes, M. V., Richardson, T.G., Ference, B.A., Davies, N.M., and Davey Smith, G. (2021).

495   Integrating genomics with biomarkers and therapeutic targets to invigorate cardiovascular  
496   drug development. *Nat. Rev. Cardiol.* *18*, 435–453.

497   2. Chen, V.L., Du, X., Chen, Y., Kuppa, A., Handelman, S.K., Vohnoutka, R.B., Peyser, P.A.,

498   Palmer, N.D., Bielak, L.F., Halligan, B., et al. (2021). Genome-wide association study of serum  
499   liver enzymes implicates diverse metabolic and liver pathology. *Nat. Commun.* 2021 121 *12*,

500   1–13.

501   3. Pekkanen, J., Linn, S., Heiss, G., Suchindran, C.M., Leon, A., Rifkind, B.M., and Tyroler, H.A.

502   (2010). Ten-Year Mortality from Cardiovascular Disease in Relation to Cholesterol Level

503   among Men with and without Preexisting Cardiovascular Disease. *NEJM* *322*, 1700–1707.

504   4. Diabetes Prevention Program Research Group (2002). Reduction of the incidence of type

505   2 diabetes with lifestyle intervention or metformin. *N. Engl. J. Med.* *34*, 162–163.

506   5. Seth, R., Kydd, A.S., Buchbinder, R., Bombardier, C., and Edwards, C.J. (2014). Allopurinol

507   for chronic gout. *Cochrane Database Syst. Rev.* *2014*.

508   6. Hunter, D.J. (2005). Gene–environment interactions in human diseases. *Nat. Rev. Genet.*

509   2005 *6*, 287–298.

510   7. Brookes, S.T., Whitely, E., Egger, M., Davey Smith, G., Mulheran, P.A., and Peters, T.J.

511   (2004). Subgroup analyses in randomized trials: risks of subgroup-specific analyses; power

512   and sample size for the interaction test. *J. Clin. Epidemiol.* *57*, 229–236.

513   8. Smith, P.G., and Day, N.E. (1984). The Design of Case-Control Studies: The Influence of

514   Confounding and Interaction Effects. *Int. J. Epidemiol.* *13*, 356–365.

515   9. Deng, W.Q., and Paré, G. (2011). A fast algorithm to optimize SNP prioritization for gene-

- 516 gene and gene-environment interactions. *Genet. Epidemiol.* 35, 729–738.
- 517 10. Paré, G., Cook, N.R., Ridker, P.M., and Chasman, D.I. (2010). On the Use of Variance per  
518 Genotype as a Tool to Identify Quantitative Trait Interaction Effects: A Report from the  
519 Women’s Genome Health Study. *PLoS Genet.* 6, e1000981.
- 520 11. Rönnegård, L., and Valdar, W. (2012). Recent developments in statistical methods for  
521 detecting genetic loci affecting phenotypic variability. *BMC Genet.* 2012 131 13, 1–7.
- 522 12. Yang, J., Loos, R.J.F., Powell, J.E., Medland, S.E., Speliotes, E.K., Chasman, D.I., Rose, L.M.,  
523 Thorleifsson, G., Steinthorsdottir, V., Mägi, R., et al. (2012). FTO genotype is associated with  
524 phenotypic variability of body mass index. *Nature* 490, 267–272.
- 525 13. Wang, H., Zhang, F., Zeng, J., Wu, Y., Kemper, K.E., Xue, A., Zhang, M., Powell, J.E.,  
526 Goddard, M.E., Wray, N.R., et al. (2019). Genotype-by-environment interactions inferred  
527 from genetic effects on phenotypic variability in the UK Biobank. *Sci. Adv.* 5, eaaw3538.
- 528 14. Brown, A.A., Buil, A., Viñuela, A., Lappalainen, T., Zheng, H.F., Richards, J.B., Small, K.S.,  
529 Spector, T.D., Dermitzakis, E.T., and Durbin, R. (2014). Genetic interactions affecting human  
530 gene expression identified by variance association mapping. *Elife* 2014, e01381.
- 531 15. Staley, J.R., Windmeijer, F., Suderman, M., Lyon, M.S., Davey Smith, G., and Tilling, K.  
532 (2021). A robust mean and variance test with application to high-dimensional phenotypes.  
533 *Eur. J. Epidemiol.* 1, 1–11.
- 534 16. Revez, J.A., Lin, T., Qiao, Z., Xue, A., Holtz, Y., Zhu, Z., Zeng, J., Wang, H., Sidorenko, J.,  
535 Kemper, K.E., et al. (2020). Genome-wide association study identifies 143 loci associated  
536 with 25 hydroxyvitamin D concentration. *Nat. Commun.* 2020 111 11, 1–12.
- 537 17. Liu, D., Ban, H.-J., El Sergani, A.M., Lee, M.K., Hecht, J.T., Wehby, G.L., Moreno, L.M.,  
538 Feingold, E., Marazita, M.L., Cha, S., et al. (2021). PRICKLE1 × FOCAD Interaction Revealed by  
539 Genome-Wide vQTL Analysis of Human Facial Traits. *Front. Genet.* 0, 1112.



- 540 18. Young, A.I., Wauthier, F.L., and Donnelly, P. (2018). Identifying loci affecting trait  
541 variability and detecting interactions in genome-wide association studies. *Nat. Genet.* *50*,  
542 1608–1614.
- 543 19. Dumitrascu, B., Darnell, G., Ayroles, J., and Engelhardt, B.E. (2019). Statistical tests for  
544 detecting variance effects in quantitative trait studies. *Bioinformatics* *35*, 200–210.
- 545 20. Corty, R.W., and Valdar, W. (2018). QTL mapping on a background of variance  
546 heterogeneity. *G3 Genes, Genomes, Genet.* *8*, 3767–3782.
- 547 21. Levene, H. (1960). Robust testes for equality of variances. *Contrib. to Probab. Stat.* 278–  
548 292.
- 549 22. Brown, M.B., and Forsythe, A.B. (1974). Robust tests for the equality of variances. *J. Am.*  
550 *Stat. Assoc.* *69*, 364–367.
- 551 23. Soave, D., and Sun, L. (2017). A generalized Levene’s scale test for variance  
552 heterogeneity in the presence of sample correlation and group uncertainty. *Biometrics* *73*,  
553 960–971.
- 554 24. Glejser, H. (1969). A New Test for Heteroskedasticity. *J. Am. Stat. Assoc.* *64*, 316.
- 555 25. Pietrosanu, M., Gao, J., Kong, L., Jiang, B., and Niu, D. (2020). Advanced algorithms for  
556 penalized quantile and composite quantile regression. *Comput. Stat.* 2020 361 *36*, 333–346.
- 557 26. Zhang, F., Chen, W., Zhu, Z., Zhang, Q., Nabais, M.F., Qi, T., Deary, I.J., Wray, N.R.,  
558 Visscher, P.M., McRae, A.F., et al. (2019). OSCA: a tool for omic-data-based complex trait  
559 analysis. *Genome Biol.* 2019 201 *20*, 1–13.
- 560 27. Zhu, Z., Zhang, F., Hu, H., Bakshi, A., Robinson, M.R., Powell, J.E., Montgomery, G.W.,  
561 Goddard, M.E., Wray, N.R., Visscher, P.M., et al. (2016). Integration of summary data from  
562 GWAS and eQTL studies predicts complex trait gene targets. *Nat. Genet.* *48*, 481–487.
- 563 28. Oehlert, G.W. (1992). A Note on the Delta Method. *Source Am. Stat.* *46*, 27–29.

- 564 29. White, H. (1980). A Heteroskedasticity-Consistent Covariance Matrix Estimator and a  
565 Direct Test for Heteroskedasticity. *Econometrica* 48, 817.
- 566 30. Hunter, D.R., and Lange, K. (2000). Quantile Regression via an MM Algorithm. *J. Comput.*  
567 *Graph. Stat.* 9, 60.
- 568 31. Guennebaud, G., Jacob, B., and others (2010). Eigen v3.
- 569 32. Band, G., and Marchini, J. (2018). BGEN: a binary file format for imputed genotype and  
570 haplotype data. *BioRxiv* 308296.
- 571 33. Morris, T.P., White, I.R., and Crowther, M.J. (2019). Using simulation studies to evaluate  
572 statistical methods. *Stat. Med.* 38, 2074–2102.
- 573 34. Bycroft, C., Freeman, C., Petkova, D., Band, G., Elliott, L.T., Sharp, K., Motyer, A.,  
574 Vukcevic, D., Delaneau, O., O’Connell, J., et al. (2018). The UK Biobank resource with deep  
575 phenotyping and genomic data. *Nature* 562, 203–209.
- 576 35. Howie, B., Marchini, J., and Stephens, M. (2011). Genotype imputation with thousands  
577 of genomes. *G3 Genes, Genomes, Genet.* 1, 457–470.
- 578 36. Mitchell, R.E., Hemani, G., Dudding, T., Corbin, L., Harrison, S., and Paternoster, L. UK  
579 Biobank Genetic Data: MRC-IEU Quality Control, version 2, 18/01/2019.
- 580 37. Fry, D., Almond, R., Moffat, S., Gordon, M., and Singh, P. (2019). UK Biobank Biomarker  
581 Project Companion Document to Accompany Serum Biomarker Data.
- 582 38. Cassidy, S., Chau, J.Y., Catt, M., Bauman, A., and Trenell, M.I. (2016). Cross-sectional  
583 study of diet, physical activity, television viewing and sleep duration in 233 110 adults from  
584 the UK Biobank; the behavioural phenotype of cardiovascular disease and type 2 diabetes.  
585 *BMJ Open* 6, e010038.
- 586 39. Elsworth, B., Lyon, M., Alexander, T., Liu, Y., Matthews, P., Hallett, J., Bates, P., Palmer,  
587 T., Haberland, V., Davey Smith, G., et al. (2020). The MRC IEU OpenGWAS data

- 588 infrastructure. *BioRxiv* 2020.08.10.244293.
- 589 40. Auton, A., Abecasis, G.R., Altshuler, D.M., Durbin, R.M., Bentley, D.R., Chakravarti, A.,  
590 Clark, A.G., Donnelly, P., Eichler, E.E., Flicek, P., et al. (2015). A global reference for human  
591 genetic variation. *Nat.* 2015 5267571 526, 68–74.
- 592 41. Hemani, G., Powell, J.E., Wang, H., Shakhbazov, K., Westra, H.-J., Esko, T., Henders, A.K.,  
593 McRae, A.F., Martin, N.G., Metspalu, A., et al. (2021). Phantom epistasis between unlinked  
594 loci. *Nat.* 2021 5967871 596, E1–E3.
- 595 42. Wang, G., Sarkar, A., Carbonetto, P., and Stephens, M. (2020). A simple new approach to  
596 variable selection in regression, with application to genetic fine mapping. *J. R. Stat. Soc. Ser.*  
597 *B (Statistical Methodology)*. 82, 1273–1300.
- 598 43. Quinlan, A.R., and Hall, I.M. (2010). BEDTools: a flexible suite of utilities for comparing  
599 genomic features. *Bioinforma. Appl. NOTE* 26, 841–842.
- 600 44. Tweedie, S., Braschi, B., Gray, K., Jones, T.E.M., Seal, R.L., Yates, B., and Bruford, E.A.  
601 (2021). Genenames.org: The HGNC and VGNC resources in 2021. *Nucleic Acids Res.* 49,  
602 D939–D946.
- 603 45. Vösa, U., Claringbould, A., Westra, H.-J., Bonder, M.J., Deelen, P., Zeng, B., Kirsten, H.,  
604 Saha, A., Kreuzhuber, R., Yazar, S., et al. (2021). Large-scale cis- and trans-eQTL analyses  
605 identify thousands of genetic loci and polygenic scores that regulate blood gene expression.  
606 *Nat. Genet.* 2021 539 53, 1300–1310.
- 607 46. GTEx Portal, <https://gtexportal.org>.
- 608 47. Campos, G. de los, Sorensen, D.A., and Toro, M.A. (2019). Imperfect Linkage  
609 Disequilibrium Generates Phantom Epistasis (& Perils of Big Data). *G3 Genes, Genomes,*  
610 *Genet.* 9, 1429–1436.
- 611 48. Stender, S., Kozlitina, J., Nordestgaard, B.G., Tybjaerg-Hansen, A., Hobbs, H.H., and

612 Cohen, J.C. (2017). Adiposity Amplifies the Genetic Risk of Fatty Liver Disease Conferred by  
613 Multiple Loci HHS Public Access Author manuscript. *Nat Genet* 49, 842–847.

614 49. Viitasalo, A., Pihlajamaki, J., Lindi, V., Atalay, M., Kaminska, D., Joro, R., and Lakka, T.A.  
615 (2015). Associations of I148M variant in PNPLA3 gene with plasma ALT levels during 2-year  
616 follow-up in normal weight and overweight children: The PANIC Study. *Pediatr. Obes.* 10,  
617 84–90.

618 50. Döring, A., Gieger, C., Mehta, D., Gohlke, H., Prokisch, H., Coassin, S., Fischer, G., Henke,  
619 K., Klopp, N., Kronenberg, F., et al. (2008). SLC2A9 influences uric acid concentrations with  
620 pronounced sex-specific effects. *Nat. Genet.* 2008 404 40, 430–436.

621 51. Ferrières, J., Sing, C.F., Roy, M., Davignon, J., and Lussier-Cacan, S. (1994).  
622 Apolipoprotein E polymorphism and heterozygous familial hypercholesterolemia. Sex-  
623 specific effects. *Arterioscler. Thromb. a J. Vasc. Biol.* 14, 1553–1560.

624 52. Ruth, K.S., Day, F.R., Tyrrell, J., Thompson, D.J., Wood, A.R., Mahajan, A., Beaumont,  
625 R.N., Wittemans, L., Martin, S., Busch, A.S., et al. (2020). Using human genetics to  
626 understand the disease impacts of testosterone in men and women. *Nat. Med.* 2020 262 26,  
627 252–258.

628 53. Masuda, M., Okuda, K., Ikeda, D.D., Hishigaki, H., and Fujiwara, T. (2015). Interaction of  
629 genetic markers associated with serum alkaline phosphatase levels in the Japanese  
630 population. *Hum. Genome Var.* 2015 21 2, 1–6.

631 54. Langman, M.J.S., Leuthold, E., Robson, E.B., Harris, J., Luffman, J.E., and Harris, H. (1966).  
632 Influence of diet on the “intestinal” component of serum alkaline phosphates in people of  
633 different ABO blood groups and secretor status. *Nature* 212, 41–43.

634 55. Abul-Husn, N.S., Cheng, X., Li, A.H., Xin, Y., Schurmann, C., Stevis, P., Liu, Y., Kozlitina, J.,  
635 Stender, S., Wood, G.C., et al. (2018). A Protein-Truncating HSD17B13 Variant and

- 636 Protection from Chronic Liver Disease. *NEJM* 378, 1096–1106.
- 637 56. Gellert-Kristensen, H., Richardson, T.G., Davey Smith, G., Nordestgaard, B.G., Tybjærg-  
638 Hansen, A., and Stender, S. (2020). Combined Effect of PNPLA3, TM6SF2, and HSD17B13  
639 Variants on Risk of Cirrhosis and Hepatocellular Carcinoma in the General Population.  
640 *Hepatology* 72, 845–856.
- 641 57. Bayer, P.M., Hotschek, H., and Knoth, E. (1980). Intestinal alkaline phosphatase and the  
642 ABO blood group system--a new aspect. *Clin. Chim. Acta.* 108, 81–87.
- 643 58. Nakano, T., Shimanuki, T., Matsushita, M., Koyama, I., Inoue, I., Katayama, S., Alpers,  
644 D.H., and Komoda, T. (2006). Involvement of intestinal alkaline phosphatase in serum  
645 apolipoprotein B-48 level and its association with ABO and secretor blood group types.  
646 *Biochem. Biophys. Res. Commun.* 341, 33–38.
- 647 59. Neale, B., et al. UK Biobank GWAS, <http://www.nealelab.is/uk-biobank>
- 648 60. Kanai, M., Akiyama, M., Takahashi, A., Matoba, N., Momozawa, Y., Ikeda, M., Iwata, N.,  
649 Ikegawa, S., Hirata, M., Matsuda, K., et al. (2018). Genetic analysis of quantitative traits in  
650 the Japanese population links cell types to complex human diseases. *Nat. Genet.* 50, 390–  
651 400.
- 652 61. Young, K.A., Palmer, N.D., Fingerlin, T.E., Langefeld, C.D., Norris, J.M., Wang, N., Xiang,  
653 A.H., Guo, X., Williams, A.H., Chen, Y.D.I., et al. (2019). Genome-Wide Association Study  
654 Identifies Loci for Liver Enzyme Concentrations in Mexican-Americans: The GUARDIAN  
655 Consortium. *Obesity (Silver Spring)*. 27, 1331.
- 656 62. Chambers, J.C., Zhang, W., Sehmi, J.S., Li, X., Wass, M.N., Van der Harst, P., Holm, H.,  
657 Sanna, S., Kavousi, M., Baumeister, S.E., et al. (2011). Genome-wide association study  
658 identifies loci influencing concentrations of liver enzymes in plasma. *Nat. Genet.* 2011 4311  
659 43, 1131–1138.

- 660 63. Xu, Z.M., and Burgess, S. (2020). Polygenic modelling of treatment effect heterogeneity.  
661 *Genet. Epidemiol.* *44*, 868–879.
- 662 64. Zheng, J., Haberland, V., Baird, D., Walker, V., Haycock, P.C., Hurle, M.R., Gutteridge, A.,  
663 Erola, P., Liu, Y., Luo, S., et al. (2020). Phenome-wide Mendelian randomization mapping the  
664 influence of the plasma proteome on complex diseases. *Nat. Genet.* 2020 5210 52, 1122–  
665 1131.
- 666 65. Cao, Y., Wei, P., Bailey, M., Kauwe, J.S.K., and Maxwell, T.J. (2014). A versatile omnibus  
667 test for detecting mean and variance heterogeneity. *Genet. Epidemiol.* *38*, 51–59.
- 668 66. Ek, W.E., Rask-Andersen, M., Karlsson, T., Enroth, S., Gyllensten, U., and Johansson, Å.  
669 (2018). Genetic variants influencing phenotypic variance heterogeneity. *Hum. Mol. Genet.*  
670 *27*, 799–810.
- 671 67. Rees, J.M.B., Foley, C.N., and Burgess, S. (2020). Factorial Mendelian randomization:  
672 using genetic variants to assess interactions. *Int. J. Epidemiol.* *49*, 1147–1158.
- 673 68. Lyon, M.S., Andrews, S.J., Elsworth, B., Gaunt, T.R., Hemani, G., and Marcora, E. (2021).  
674 The variant call format provides efficient and robust storage of GWAS summary statistics.  
675 *Genome Biol.* *22*, 32.  
676

677 **Figure 1. Variance effect estimate accuracy and confidence interval coverage**

678 Variance effect estimate accuracy (A, B) and 95% confidence interval coverage (C, D) of  
679 simulated genotypes with linear effect on outcome variance (A, C) or interaction effect (B,  
680 D). LAD-BF, least-absolute deviation regression Brown-Forsythe. OSCA-BF, original Brown-  
681 Forsythe test implemented in OSCA<sup>26</sup> including effect estimate derived from the test P-  
682 value<sup>27</sup>. CI, confidence interval.

683 **Figure 2. Effect of top gene-environment interaction loci on trait mean and variance**

684 Per-allele effect of SNP stratified by modifier on outcome mean estimated with  
685 heteroscedastic-consistent standard errors<sup>29</sup> and unstratified effect of SNP on variance  
686 estimated using LAD-BF (genotype 0 vs 1 and 0 vs 2) with or without adjustment for the  
687 interaction term. All estimates were adjusted for age, sex (except for rs1065853, rs1799941  
688 and rs938555 on variance as the modifier was sex) and top ten genetic principal  
689 components. SD, standard deviation. CI, confidence interval. ALT, alanine aminotransferase.  
690 LDL, low-density lipoprotein. BMI, body mass index. Low BMI,  $\leq 26.7 \text{ kg/m}^2$ . High BMI,  $>$   
691  $26.7 \text{ kg/m}^2$ .



692 **Figure 3. Effect of top gene-gene interaction loci on trait mean and variance**

693 Per allele effect of SNP stratified by modifier on outcome mean estimated with  
694 heteroscedastic-consistent standard errors<sup>29</sup> and unstratified effect of SNP on variance  
695 estimated using LAD-BF (genotype 0 vs 1 and 0 vs 2) with or without adjustment for the  
696 interaction term. All estimates were adjusted for age, sex, and top ten genetic principal  
697 components. SD, standard deviation. CI, confidence interval. ALP, alkaline phosphatase. ALT,  
698 alanine aminotransferase. AST, aspartate aminotransferase. GGT, gamma  
699 glutamyltransferase.

700 **Table 1. Simulation studies of the Brown-Forsythe test**

| <b>Figure</b> | <b>Aim</b>                                                                                      | <b>Conditions</b>                                                                                        |
|---------------|-------------------------------------------------------------------------------------------------|----------------------------------------------------------------------------------------------------------|
| <b>1</b>      | Determine variance effect estimate accuracy and confidence interval coverage                    | Increasing interaction effect size.                                                                      |
| <b>S2</b>     | Estimate power of variance tests to detect interaction effects using normal/non-normal outcomes | Increasing interaction effect size.<br>Normal, log-normal, and t-distribution residuals                  |
| <b>S3</b>     | Estimate type I error of variance tests with normal/non-normal outcomes                         | Increasing SNP minor allele frequency.<br>Normal, log-normal, t-distribution, and mixed-normal residuals |
| <b>S4</b>     | Adjusting for interaction effect on variance effect estimate                                    | With/without adjustment for modifier and interaction term in first-stage model                           |
| <b>S5</b>     | Estimate model runtime performance                                                              | Increasing number of CPU threads                                                                         |

701 SNP, single-nucleotide polymorphism. Log, natural logarithm. CPU, central processing unit.

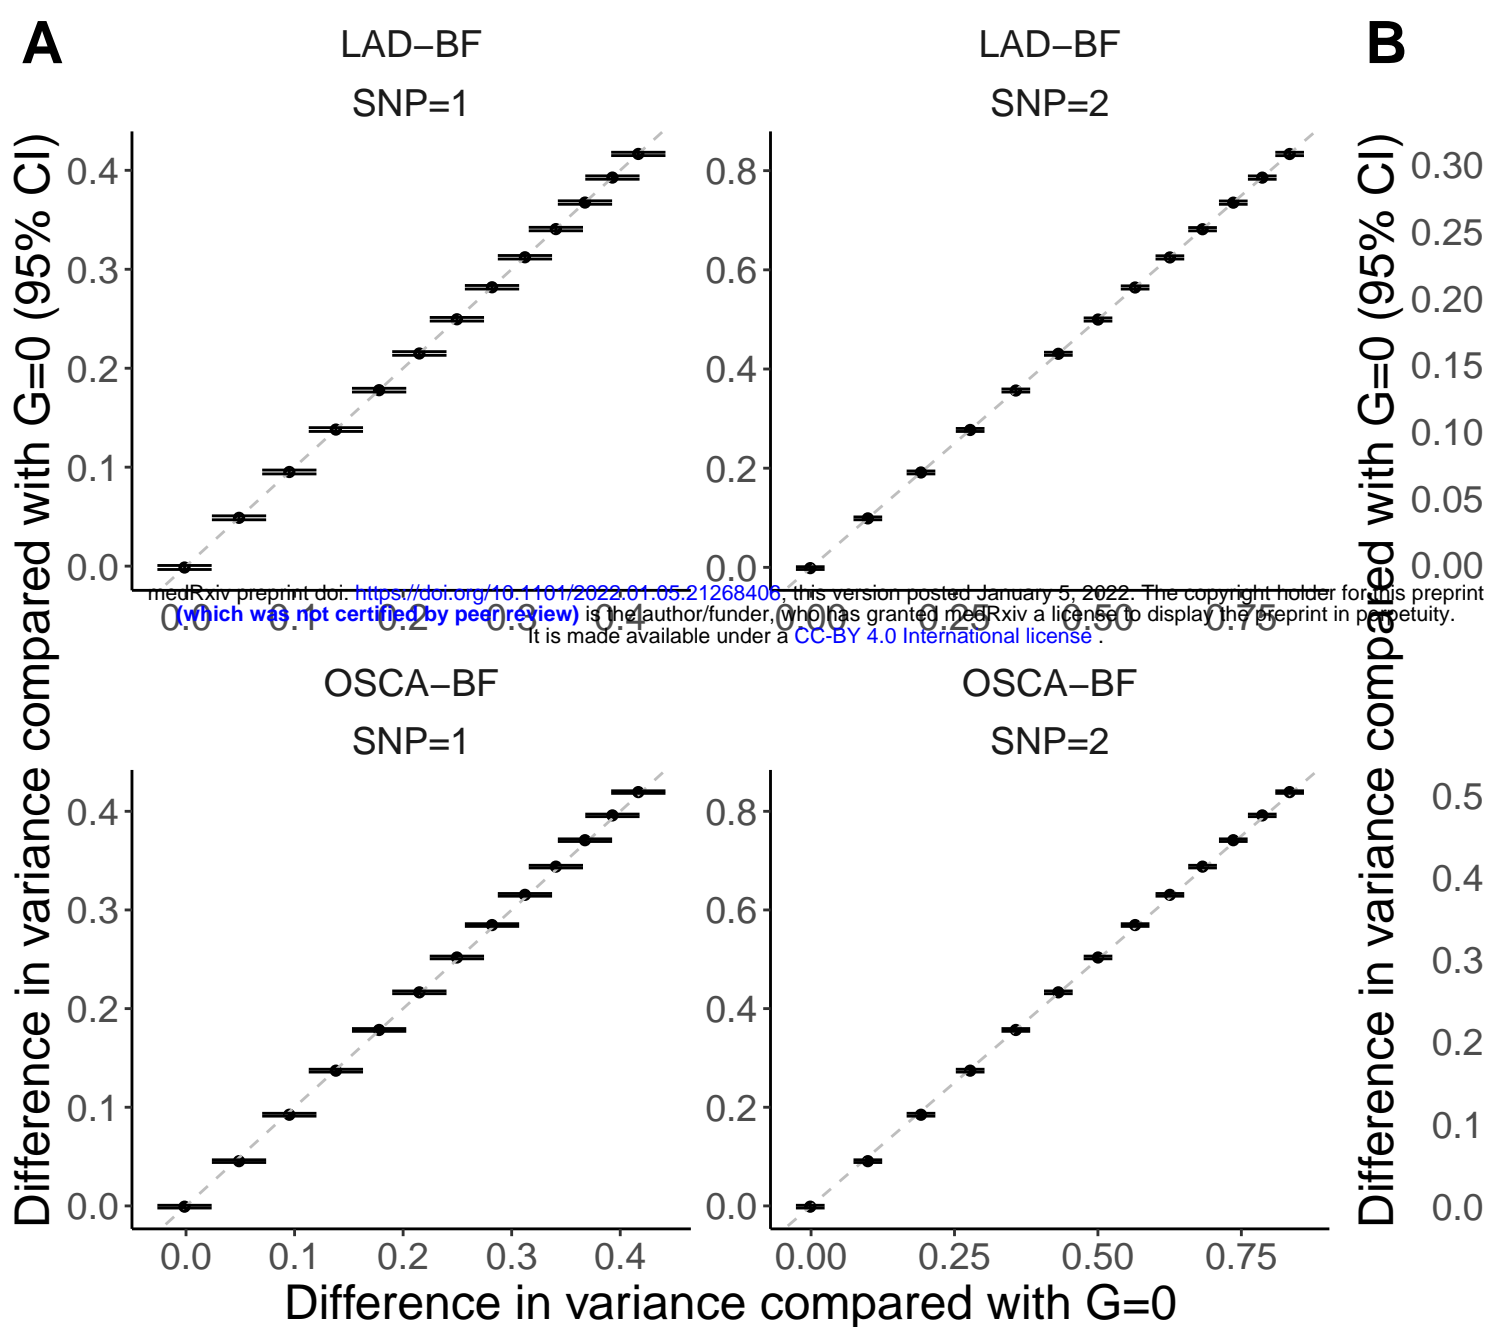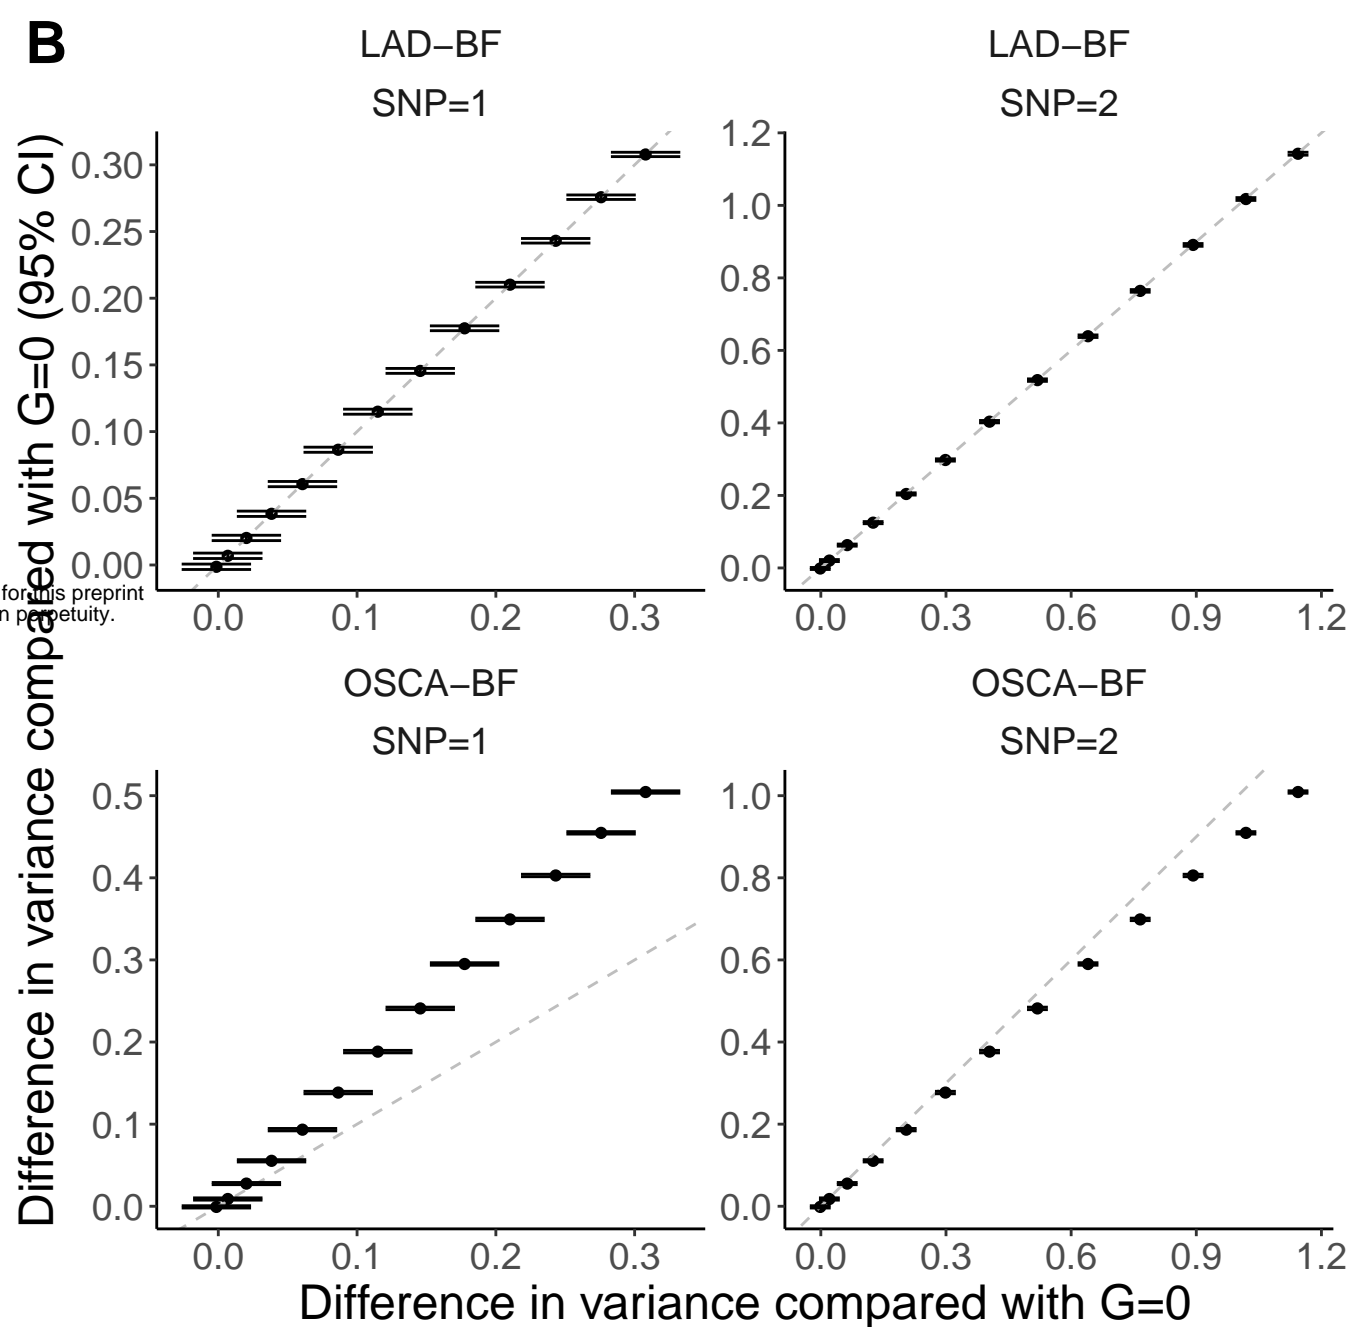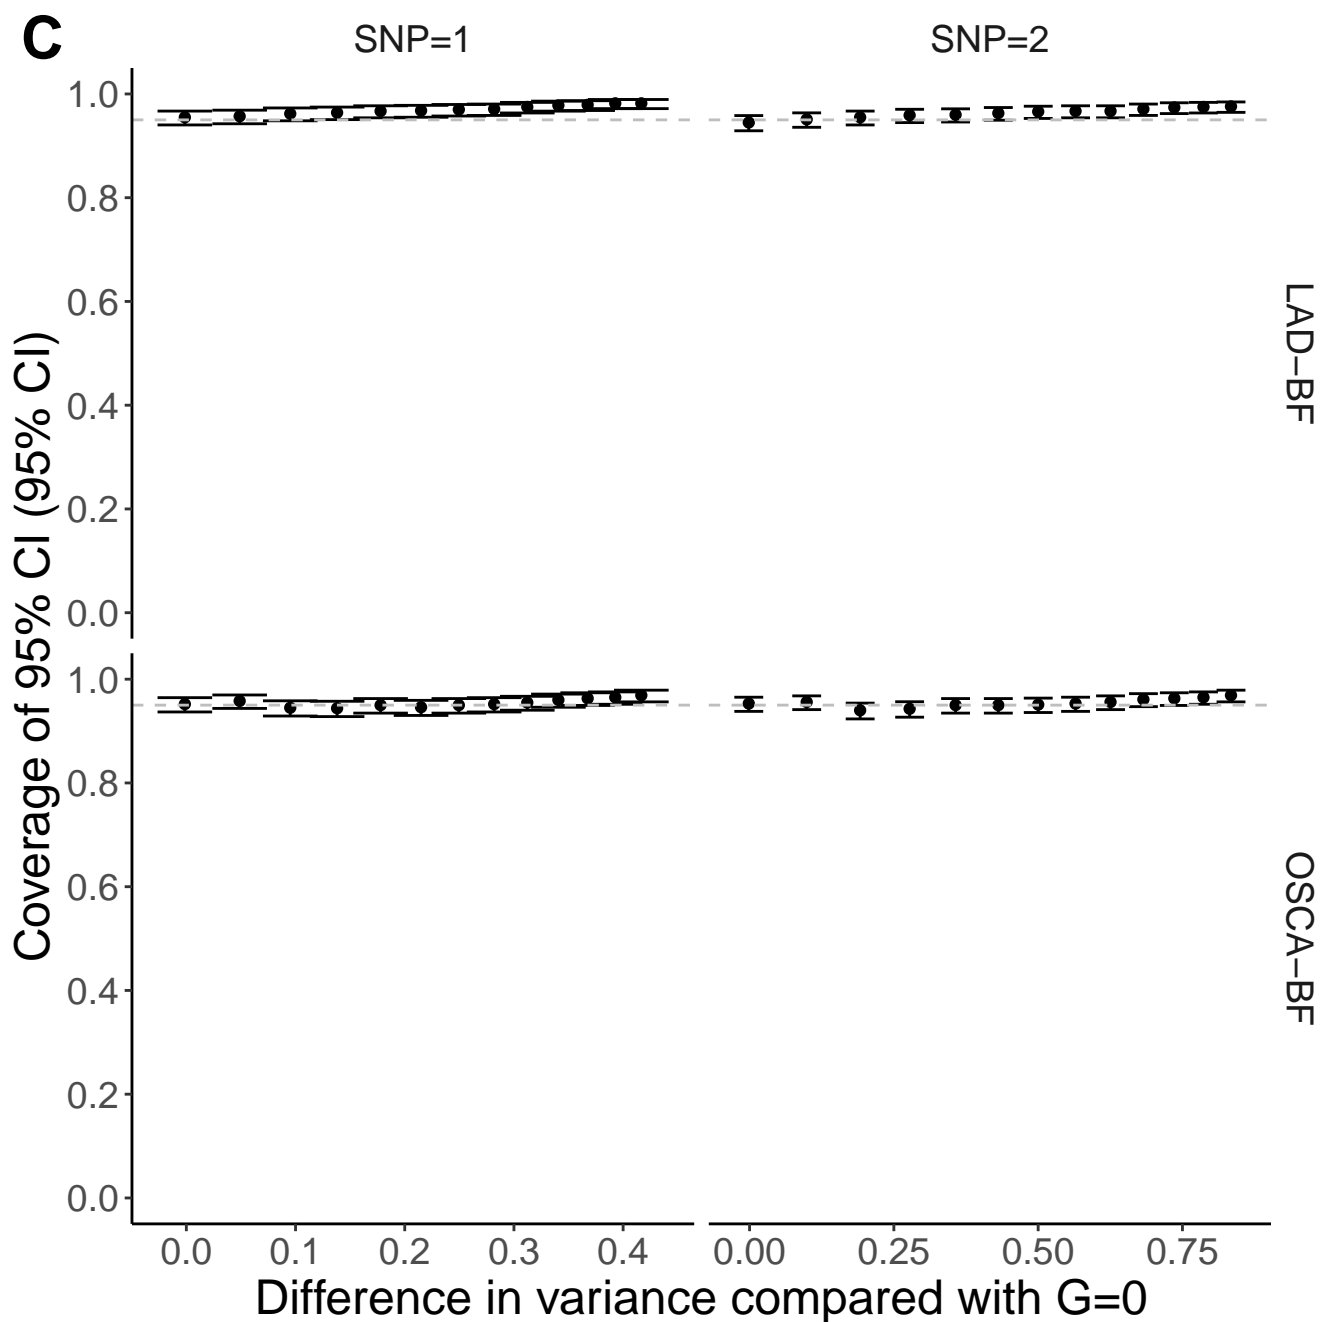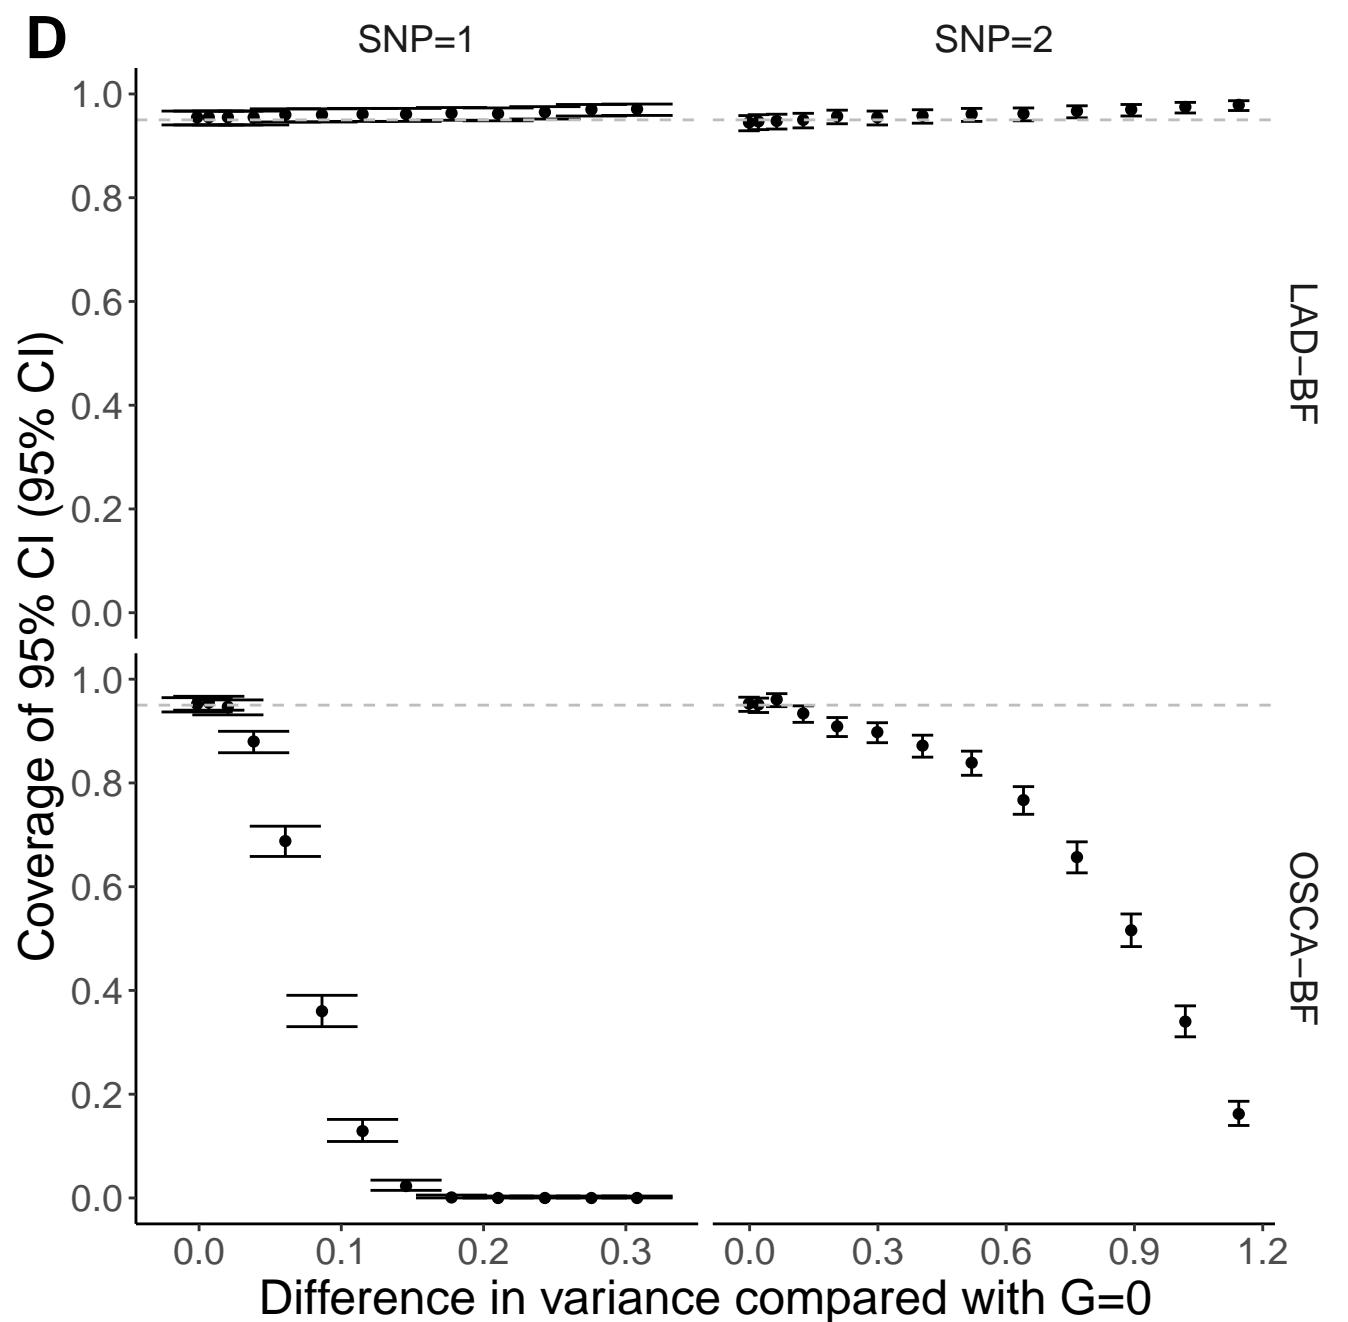

ALT  
PNPLA3 (rs738409)  
BMI

Mean

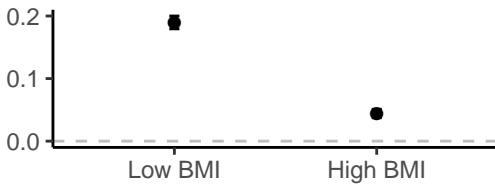

ALT  
PNPLA3 (rs738409)  
BMI

Variance

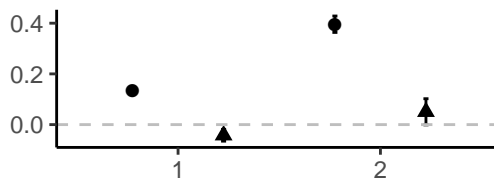

ALT  
TM6SF2 (rs58542926)  
BMI

Mean

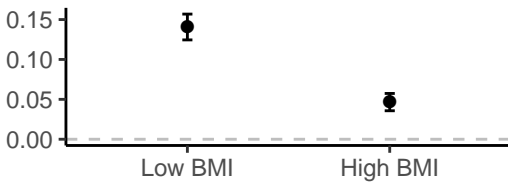

ALT  
TM6SF2 (rs58542926)  
BMI

Variance

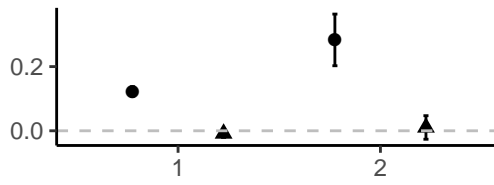

LDL  
APOE (rs1065853)  
Sex

Mean

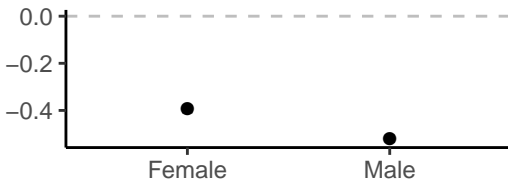

LDL  
APOE (rs1065853)  
Sex

Variance

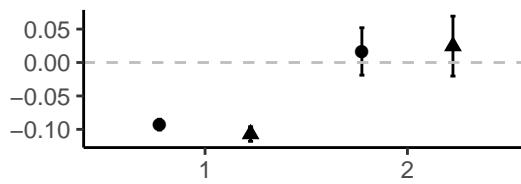

Interaction

- Unadjusted
- ▲ Adjusted

Testosterone  
SHBG (rs1799941)  
Sex

Mean

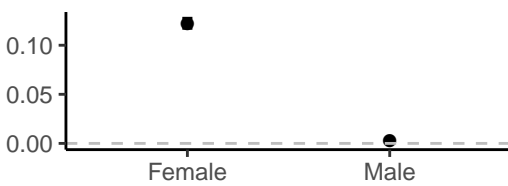

Testosterone  
SHBG (rs1799941)  
Sex

Variance

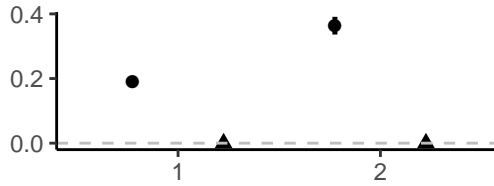

Urate  
SLC2A9 (rs938555)  
Sex

Mean

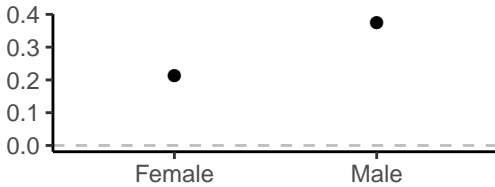

Urate  
SLC2A9 (rs938555)  
Sex

Variance

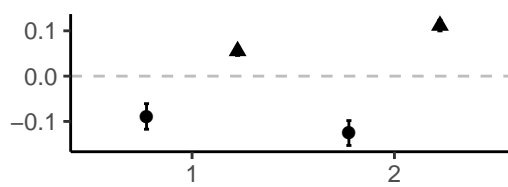

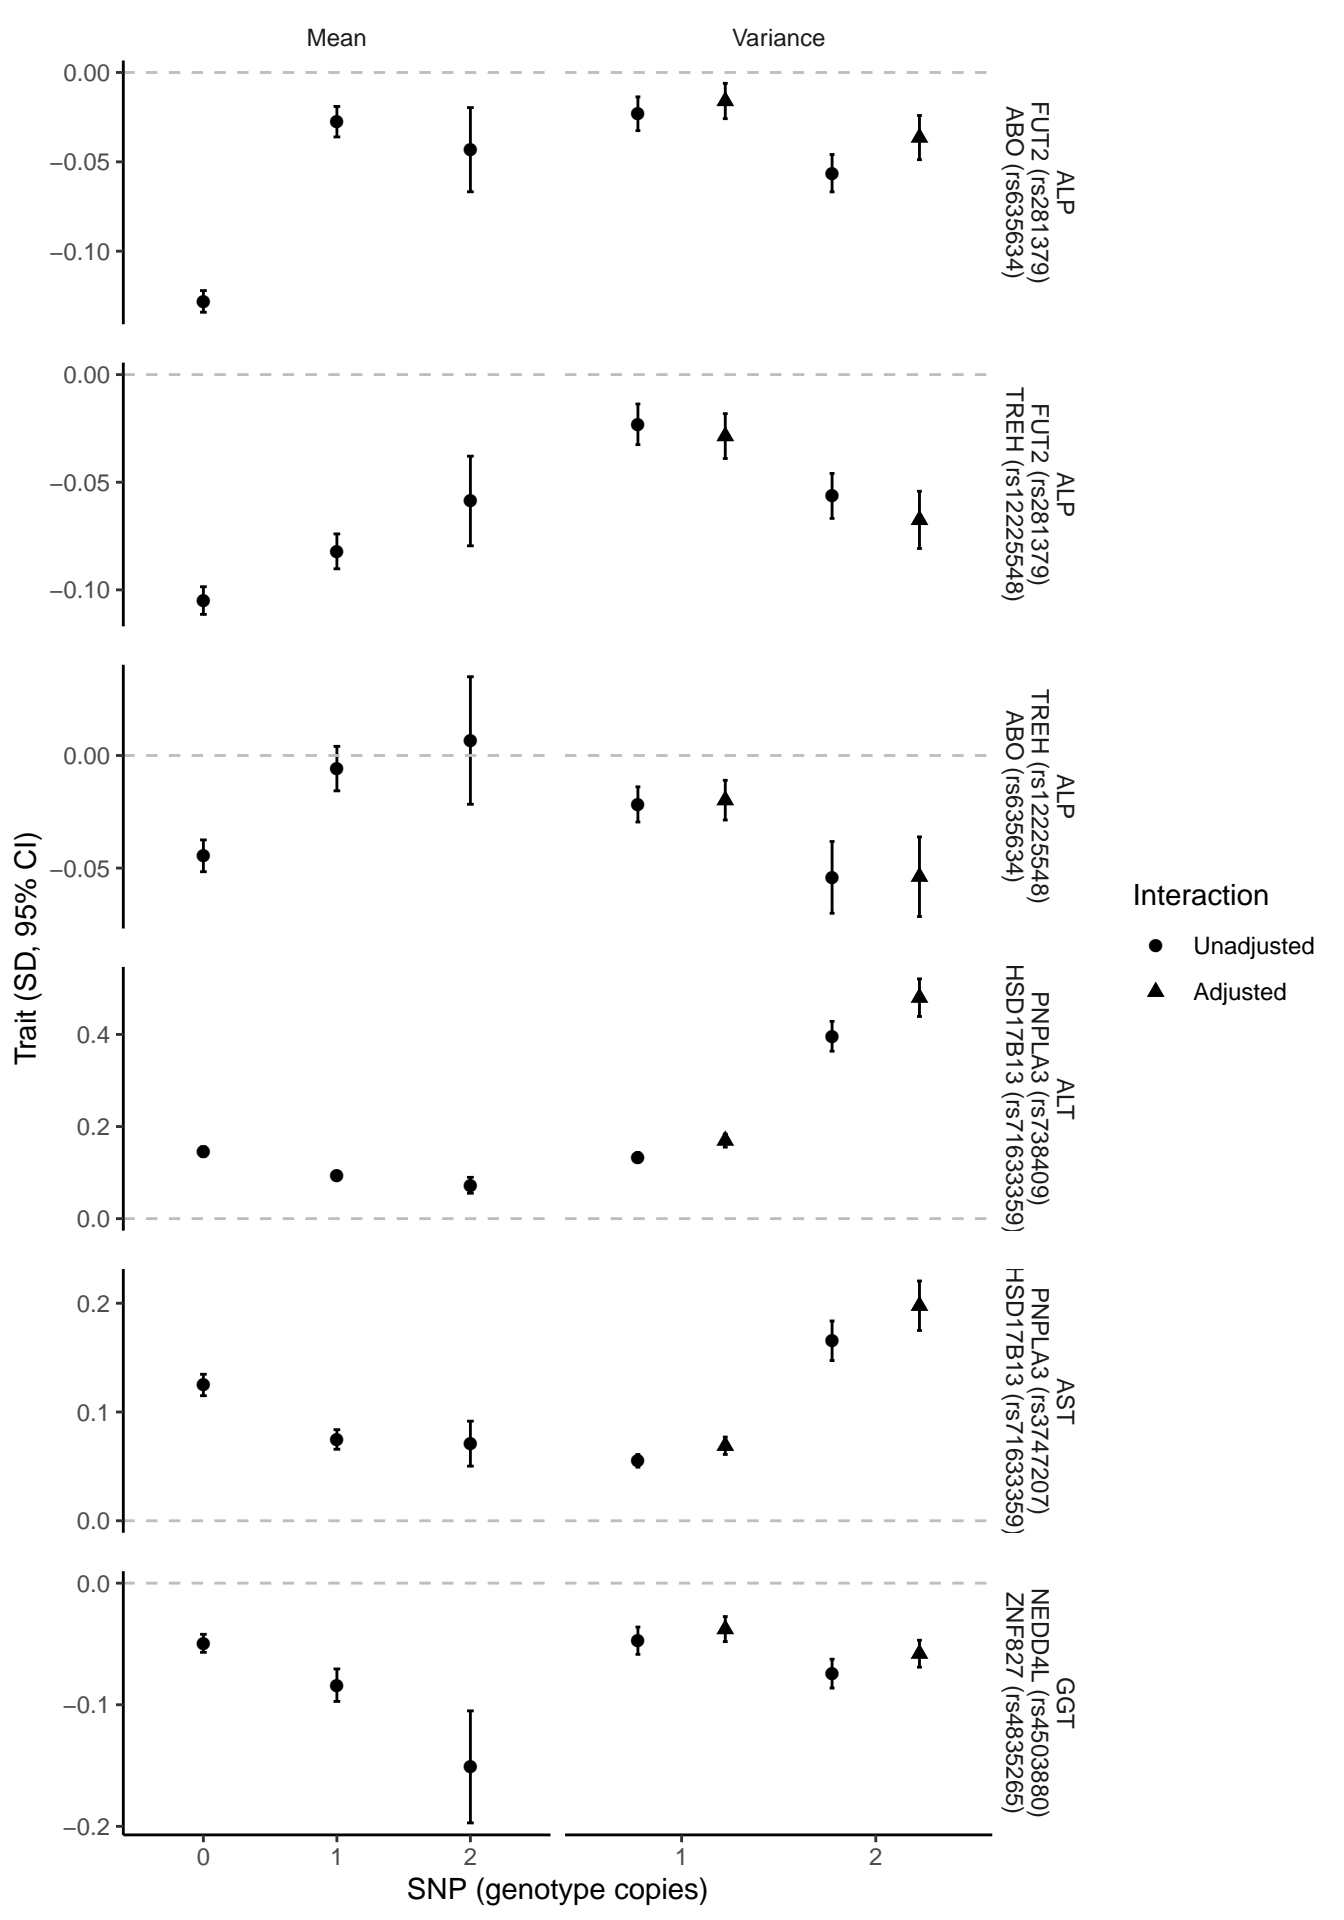

Source: https://medrxiv.org/content/10.1101/2022.01.05.21268406v1.full.pdf
